# Supplementary material for: On-site chemical reaction lights up protein assemblies in cells
Source: Royal Society of Chemistry journal article supplement (doi:10.1039/c2an16123k), 2012-01-01
Supplement: c2an16123k.pdf [file c2an16123k.pdf]

## SUPPLEMENTARY INFORMATION

### Breast cancer cells

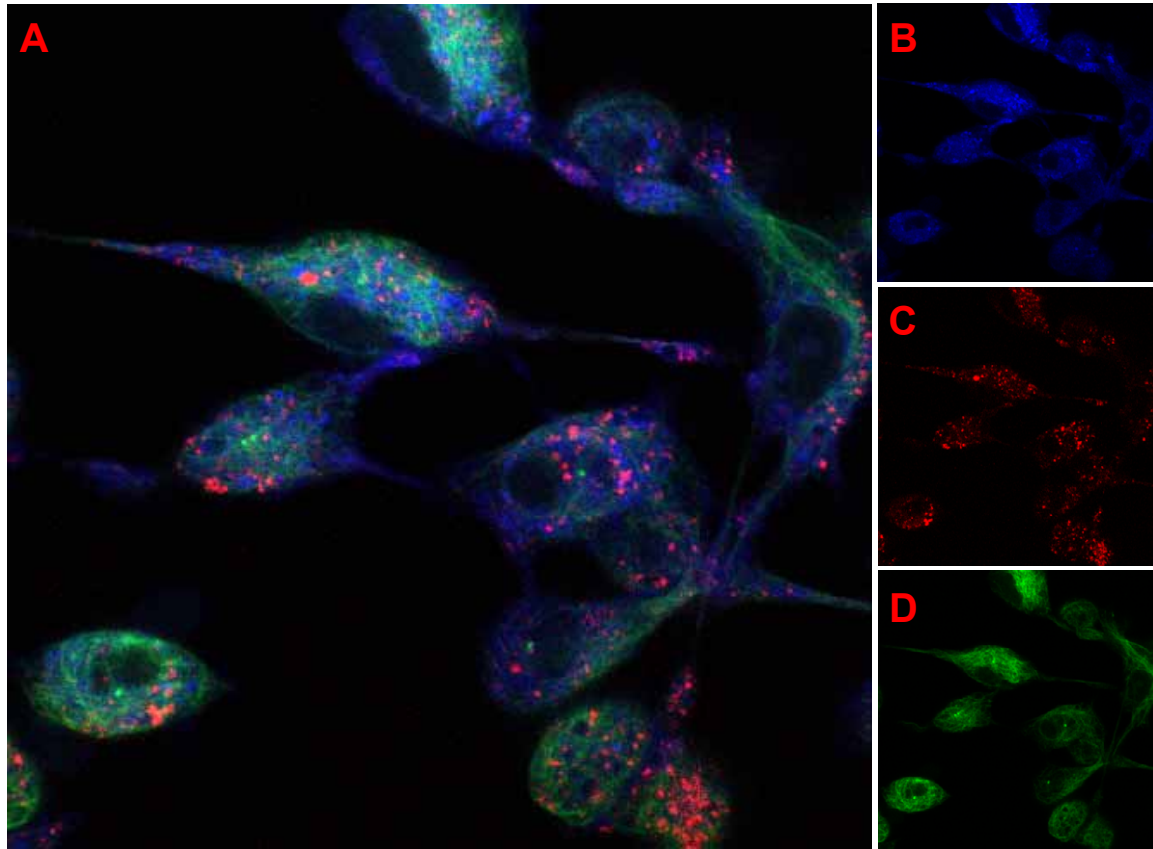

**Fig. S1** Confocal laser scanning microscopy images of MCF-7 cells show staining of fluorescamine and organelle specific trackers. (A) The co-localization and specificity of fluorescamine staining can be seen from the superimposed image of three RGB channels. Lysosome and tubulin of A-549 cells were stained by trackers to facilitate observing the co-localization of cellular compartment staining and fluorescamine mapping of cellular proteins; images were obtained by (B) blue channel for fluorescamine, (C) red channel for lysosome tracker staining and (D) green channel for tubulin tracker staining. Magenta fluorescence represents the co-localization of lysosome staining by fluorescamine and tracker.

## Lung cancer cells

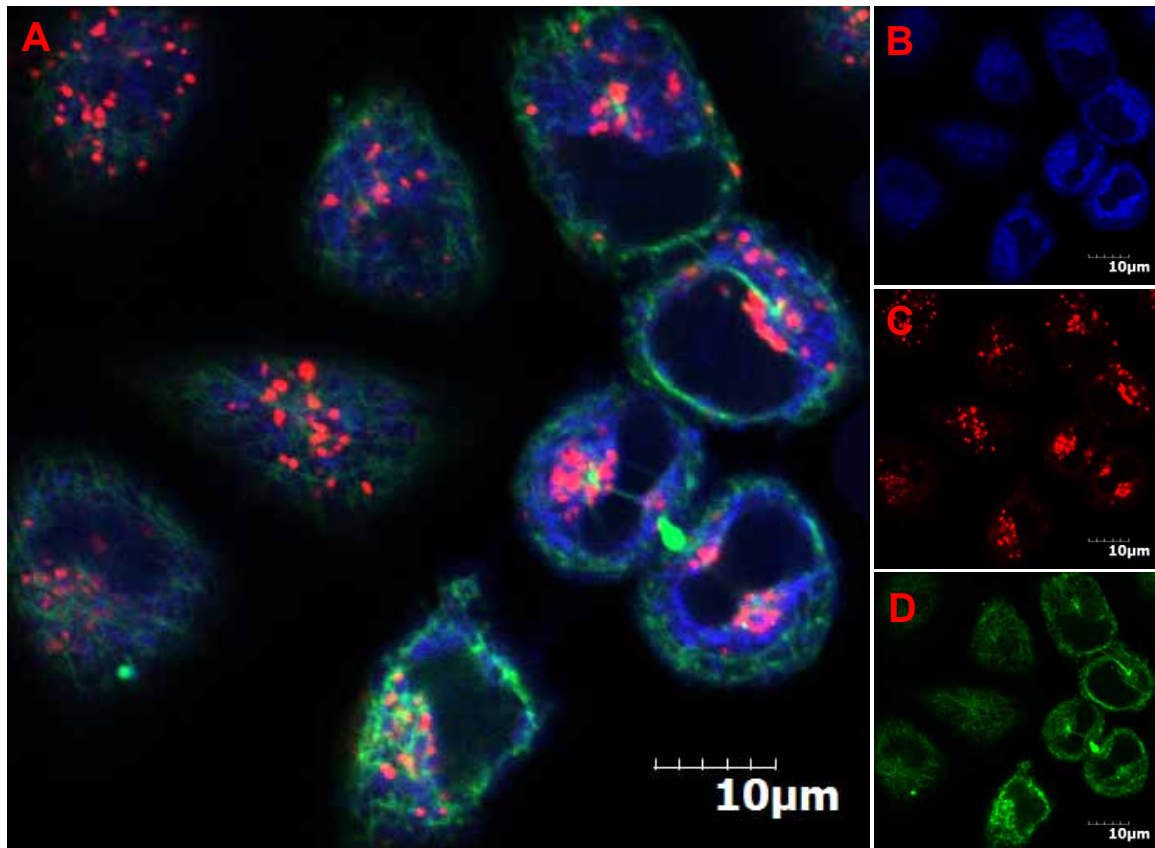

**Fig. S2** Confocal laser scanning microscopy images of A-549 cells show staining of fluorescamine and organelle specific trackers. (A) The co-localization and specificity of fluorescamine staining can be seen from the superimposed image of three RGB channels. Lysosome and tubulin of A-549 cells were stained by trackers to facilitate observing the co-localization of cellular compartment staining and fluorescamine mapping of cellular proteins; images were obtained by (B) blue channel for fluorescamine, (C) red channel for lysosome tracker staining and (D) green channel for tubulin tracker staining. Magenta fluorescence represents the co-localization of lysosome staining by fluorescamine and tracker.
